# Supplementary material for: Epithelial-mesenchymal transition gene signature is associated with prognosis and tumor microenvironment in head and neck squamous cell carcinoma
Source: PubMed Central journal article supplement (PMC7046610; doi:10.1038/s41598-020-60707-x), 2020-02-27

## **Supplementary Information**

### **Epithelial-mesenchymal transition gene signature is associated with prognosis and tumor microenvironment in head and neck squamous cell carcinoma**

Ah Ra Jung<sup>1+</sup>, Chan-Hun Jung<sup>1+</sup>, Joo Kyung Noh<sup>2</sup>, Young Chan Lee<sup>1</sup>, Young-Gyu Eun<sup>1\*</sup>

<sup>1</sup>Department of Otolaryngology - Head & Neck Surgery, School of Medicine, Kyung Hee University, Seoul, Korea

<sup>2</sup>Department of Biomedical Science and Technology, Graduate School, Kyung Hee University, Seoul, Korea

<sup>+</sup>These authors contributed equally to this study.

**\*Corresponding author:** Young-Gyu Eun, E-mail: [ygeun@khu.ac.kr](mailto:ygeun@khu.ac.kr)

**Supplementary Table S1.** The EMT signature genes

| <b>Gene symbol</b> | <b>correlation<br/>coefficient<br/>with gene<br/>expression of<br/><i>CDH1</i></b> | <b>correlation<br/>coefficient<br/>with gene<br/>expression of<br/><i>VIM</i></b> | <b>correlation<br/>coefficient<br/>with gene<br/>expression of<br/><i>CDH2</i></b> | <b>correlation<br/>coefficient<br/>with gene<br/>expression of<br/><i>FNI</i></b> | <b><i>p</i>-value</b> |
|--------------------|------------------------------------------------------------------------------------|-----------------------------------------------------------------------------------|------------------------------------------------------------------------------------|-----------------------------------------------------------------------------------|-----------------------|
| CDH1               | 1                                                                                  |                                                                                   |                                                                                    |                                                                                   | NA                    |
| DSP                | 0.715                                                                              |                                                                                   |                                                                                    |                                                                                   | 1.04959E-81           |
| PKP1               | 0.714                                                                              |                                                                                   |                                                                                    |                                                                                   | 1.68453E-81           |
| MAP7               | 0.704                                                                              |                                                                                   |                                                                                    |                                                                                   | 4.01876E-78           |
| ESRP1              | 0.774                                                                              |                                                                                   |                                                                                    |                                                                                   | 1.1383E-103           |
| KRT6A              | 0.640                                                                              |                                                                                   |                                                                                    |                                                                                   | 1.00919E-60           |
| C1orf116           | 0.621                                                                              |                                                                                   |                                                                                    |                                                                                   | 2.69365E-56           |
| SERPINB5           | 0.608                                                                              |                                                                                   |                                                                                    |                                                                                   | 2.27987E-53           |
| LASS3              | 0.604                                                                              |                                                                                   |                                                                                    |                                                                                   | 1.79357E-52           |
| LAD1               | 0.685                                                                              |                                                                                   |                                                                                    |                                                                                   | 1.74058E-72           |
| PERP               | 0.612                                                                              |                                                                                   |                                                                                    |                                                                                   | 2.81884E-54           |
| JUP                | 0.646                                                                              |                                                                                   |                                                                                    |                                                                                   | 4.05629E-62           |
| DSG3               | 0.654                                                                              |                                                                                   |                                                                                    |                                                                                   | 4.00587E-64           |
| DSC3               | 0.605                                                                              |                                                                                   |                                                                                    |                                                                                   | 9.63006E-53           |
| OVOL1              | 0.651                                                                              |                                                                                   |                                                                                    |                                                                                   | 3.09526E-63           |
| GRHL2              | 0.644                                                                              |                                                                                   |                                                                                    |                                                                                   | 1.44519E-61           |

---

|          |       |             |
|----------|-------|-------------|
| ERBB3    | 0.605 | 1.06497E-52 |
| MARVELD3 | 0.616 | 5.51337E-55 |
| EVPL     | 0.643 | 1.95081E-61 |
| TRIM29   | 0.680 | 4.86046E-71 |
| FAM83B   | 0.618 | 1.6913E-55  |
| ESRP2    | 0.661 | 5.47739E-66 |
| CDS1     | 0.666 | 3.79693E-67 |
| EPN3     | 0.606 | 5.70893E-53 |
| EPHA1    | 0.601 | 7.00609E-52 |
| KLF5     | 0.606 | 5.73733E-53 |
| ABLIM1   | 0.618 | 1.8118E-55  |
| PPL      | 0.646 | 3.72067E-62 |
| GRHL3    | 0.691 | 2.25004E-74 |
| HAS3     | 0.623 | 1.40427E-56 |
| ZNF750   | 0.664 | 7.93184E-67 |
| A2ML1    | 0.626 | 3.0313E-57  |
| PRRG4    | 0.627 | 1.74849E-57 |
| MAL2     | 0.651 | 2.39857E-63 |
| RAB25    | 0.650 | 3.76869E-63 |
| TTC22    | 0.615 | 7.8741E-55  |

---

---

|         |       |       |             |
|---------|-------|-------|-------------|
| IRF6    | 0.624 |       | 8.22508E-57 |
| GRHL1   | 0.699 |       | 9.53222E-77 |
| VIM     |       | 1     | NA          |
| ANXA6   |       | 0.763 | 2.7572E-99  |
| LIX1L   |       | 0.724 | 1.3177E-84  |
| HLX     |       | 0.710 | 4.06598E-80 |
| SYT11   |       | 0.706 | 5.93141E-79 |
| GNAI2   |       | 0.706 | 8.54983E-79 |
| FYN     |       | 0.731 | 2.79586E-87 |
| ATP10A  |       | 0.717 | 2.19778E-82 |
| CNRIP1  |       | 0.725 | 5.77421E-85 |
| EMILIN1 |       | 0.730 | 6.08807E-87 |
| DAB2    |       | 0.735 | 1.51914E-88 |
| OLFML2B |       | 0.778 | 1.7081E-105 |
| COL6A1  |       | 0.721 | 7.96813E-84 |
| ZEB2    |       | 0.742 | 4.06176E-91 |
| COL6A2  |       | 0.750 | 5.94027E-94 |
| ST3GAL2 |       | 0.758 | 4.20545E-97 |
| OLFML3  |       | 0.756 | 2.43112E-96 |
| ACVRL1  |       | 0.702 | 1.34816E-77 |

---

---

|        |       |       |             |
|--------|-------|-------|-------------|
| CMTM3  | 0.725 |       | 6.65313E-85 |
| PMP22  | 0.746 |       | 1.14563E-92 |
| PCOLCE | 0.751 |       | 2.50175E-94 |
| GPR124 | 0.707 |       | 3.63533E-79 |
| TIMP2  | 0.709 |       | 8.15841E-80 |
| LAMA4  | 0.714 |       | 2.50937E-81 |
| CDH2   |       | 1     | NA          |
| DACT1  |       | 0.708 | 2.42451E-79 |
| FN1    |       |       | 1 NA        |
| FSTL1  |       | 0.815 | 1.7796E-123 |
| FAP    |       | 0.809 | 1.3555E-120 |
| CALD1  |       | 0.808 | 4.766E-120  |
| COL5A1 |       | 0.843 | 5.4019E-140 |
| VCAN   |       | 0.823 | 3.635E-128  |
| COL5A2 |       | 0.829 | 1.3833E-131 |
| GLT8D2 |       | 0.807 | 2.9154E-119 |
| POSTN  |       | 0.853 | 9.5235E-147 |
| COL1A1 |       | 0.850 | 7.4847E-145 |
| ADAM12 |       | 0.830 | 3.0152E-132 |
| COL6A3 |       | 0.830 | 5.032E-132  |

---

---

|        |       |             |
|--------|-------|-------------|
| SPARC  | 0.819 | 1.1234E-125 |
| ZNF469 | 0.811 | 2.2673E-121 |
| COL1A2 | 0.840 | 2.9374E-138 |
| NID2   | 0.847 | 9.8379E-143 |
| COL3A1 | 0.838 | 3.2086E-137 |
| PDGFRB | 0.802 | 5.2039E-117 |

---

Abbreviations: NA, not available.

**Supplementary Table S2.** Association of the EMT signature with other subtypes of HNSCC.

|                     | <b>Mes</b> | <b>Epi</b> | <b><i>p</i>-value</b> |
|---------------------|------------|------------|-----------------------|
| Gender              |            |            | 0.702                 |
| Male                | 267        | 247        |                       |
| Female              | 86         | 73         |                       |
| Age                 |            |            | 0.305                 |
| <60 years           | 167        | 165        |                       |
| >60 years           | 186        | 155        |                       |
| Tumor site          |            |            | 0.074                 |
| Oral cavity         | 189        | 156        |                       |
| Oropharynx          | 69         | 79         |                       |
| Larynx              | 66         | 71         |                       |
| Hypopharynx         | 26         | 13         |                       |
| Primary tumor       |            |            | 0.851                 |
| T1                  | 42         | 33         |                       |
| T2                  | 100        | 98         |                       |
| T3                  | 75         | 70         |                       |
| T4                  | 136        | 119        |                       |
| Regional lymph node |            |            | 0.138                 |
| N (-)               | 152        | 157        |                       |
| N (+)               | 201        | 163        |                       |
| Stage               |            |            | 0.383                 |
| I                   | 17         | 18         |                       |
| II                  | 65         | 57         |                       |
| III                 | 56         | 66         |                       |
| IV                  | 215        | 179        |                       |
| HPV status          |            |            | 0.187                 |
| Positive            | 46         | 51         |                       |
| Negative            | 228        | 183        |                       |
| Tobacco use         |            |            | 0.995                 |
| Never               | 74         | 67         |                       |

|             |     |     |       |
|-------------|-----|-----|-------|
| Yes         | 272 | 251 |       |
| Alcohol use |     |     | 0.171 |
| Never       | 79  | 87  |       |
| Yes         | 270 | 229 |       |

---



**Supplementary Table S3.** Comparison of somatic mutation frequencies between the Mesenchymal and Epithelial groups.

|        |     | <b>Mes</b> | <b>Epi</b> | <b>Fisher's <i>p</i>-value</b> |
|--------|-----|------------|------------|--------------------------------|
| EGFR   | MUT | 15         | 4          | 1.89E-03*                      |
|        | WT  | 242        | 232        |                                |
| HRAS   | MUT | 11         | 16         | 0.240                          |
|        | WT  | 246        | 220        |                                |
| KRAS   | MUT | 1          | 0          | 1                              |
|        | WT  | 256        | 236        |                                |
| PIK3CA | MUT | 45         | 45         | 0.726                          |
|        | WT  | 212        | 191        |                                |
| PTEN   | MUT | 6          | 8          | 0.591                          |
|        | WT  | 251        | 228        |                                |
| TP53   | MUT | 200        | 151        | 0.001*                         |
|        | WT  | 57         | 85         |                                |

**Supplementary Table S4.** Top significant KEGG pathways associated with EMT signature genes.

| <b>KEGG pathway</b>                                    | <b>Count</b> | <b>Molecules</b>                                                                        | <b>p-value</b> |
|--------------------------------------------------------|--------------|-----------------------------------------------------------------------------------------|----------------|
| ECM-receptor interaction                               | 10           | COL1A1, COL1A2, COL3A1, COL5A1, COL5A2, COL6A1, COL6A2, COL6A3, FN1, LAMA4              | 4.3e-11*       |
| Focal adhesion                                         | 12           | FYN, COL1A1, COL1A2, COL3A1, COL5A1, COL5A2, COL6A1, COL6A2, COL6A3, FN1, LAMA4, PDGFRB | 2.7e-10*       |
| Protein digestion and absorption                       | 8            | COL3A1, COL5A1, COL5A2, COL6A1, COL6A2, COL6A3, COL1A1, COL1A2                          | 5.3e-8*        |
| PI3K-Akt signaling pathway                             | 11           | COL1A1, COL1A2, COL3A1, COL5A1, COL5A2, COL6A1, COL6A2, COL6A3, FN1, LAMA4, PDGFRB      | 7.2e-7*        |
| Amoebiasis                                             | 5            | COL3A1, FN1, LAMA4, COL1A1, COL1A2                                                      | 4.0e-6*        |
| Platelet activation                                    | 5            | COL3A1, GNAI2, FYN, COL1A1, COL1A2                                                      | 1.3e-5*        |
| Axon guidance                                          | 4            | EPHA1, FYN, ABLIM1, GNAI2                                                               | 0.016*         |
| Pathways in cancer                                     | 6            | GNAI2, CDH1, FN1, JUP, LAMA4, PDGFRB                                                    | 0.022*         |
| MicroRNAs in cancer                                    | 5            | ERBB3, PDGFRB, SERPINB5, VIM, ZEB2                                                      | 0.03*          |
| Arrhythmogenic right ventricular cardiomyopathy (ARVC) | 3            | CDH2, DSP, JUP                                                                          | 0.035*         |

**Supplementary Figure S1.** Full length uncropped western blotting images used to generate Figure 5.

A

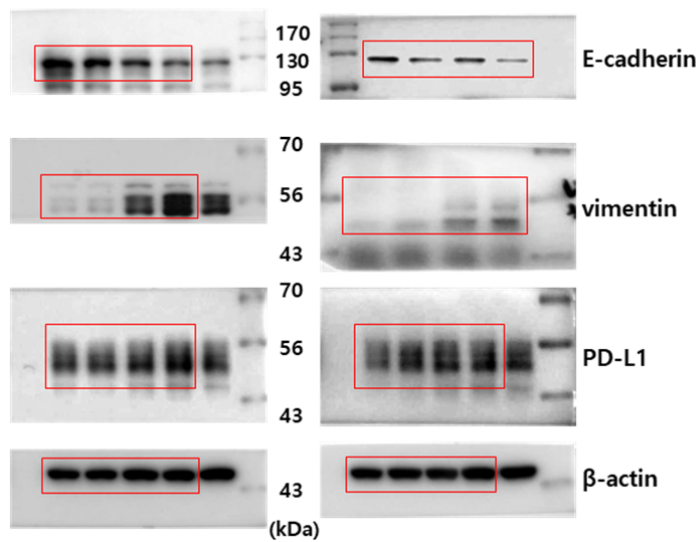

B

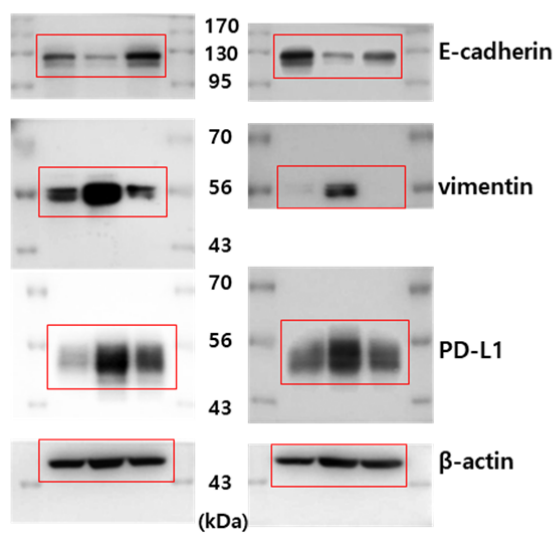

C

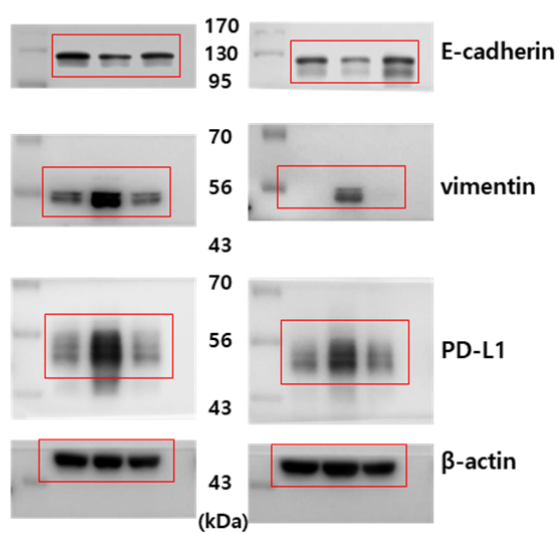

Supplement: 41598_2020_60707_MOESM1_ESM.pdf [file 41598_2020_60707_MOESM1_ESM.pdf]
